# Supplementary material for: Comprehensive Primer Sets and Cost Efficient Multiplex PCR-based eDNA Sequencing for Community Dynamics of Cyanobacteria, Eukaryotic Phytoplankton and Zooplankton in Lake
Source: Research Square preprint supplement (doi:10.21203/rs.3.rs-97365/v1), 2020-10-29
Supplement: Supplementary file 1 [file acb5088654534a4e7ceaf6e3.xlsx]

## Sheet: Sheet1
Table S1. Detailed taxa identified and their relative abundance at each of species, genus and family level for phytoplankton from the two seasons. The phylum name is listed in the left of the taxa.
April		August		April		August		April	sum	August
Species	relative abundance	Species	relative abundance	Genus	relative abundance	Genus	relative abundance	Family	relative abundance	Family	relative abundance
Cyanobacteria: Microcystis aeruginosa	0.404693	Cyanobacteria-Microcystis-aeruginosa	0.530621	Cyanobacteria: Microcystis	0.485854	Cyanobacteria-Microcystis	0.530828	Cyanobacteria: Microcystaceae	0.385915	Cyanobacteria-Microcystaceae	0.466352
Cyanobacteria: Synechococcus rubescens	0.131657	Cyanobacteria-Cyanobium-gracile	0.0663985	Bacillariophyta: Stephanodiscus	0.0831041	Cyanobacteria-Cyanobium	0.0815817	Cyanobacteria: Synechococcaceae	0.207289	Cyanobacteria-Synechococcaceae	0.25199
Bacillariophyta: Cyclotella choctawhatcheeana	0.0503874	Cyanobacteria-Synechococcus-rubescens	0.0568332	Cyanobacteria: Synechococcus	0.0648474	Cyanobacteria-Synechococcus	0.0798409	Bacillariophyta: Stephanodiscaceae	0.0983702	Bacillariophyta-Stephanodiscaceae	0.035271
Cryptophyta: Teleaulax acuta	0.0473773	Bacillariophyta-Aulacoseira-granulata	0.0375963	Cryptophyta: Teleaulax	0.0292527	Bacillariophyta-Cyclotella	0.0297659	Chlorophyta: Chlamydomonadaceae	0.0413319	Cryptophyta-Cryptomonadaceae	0.0243744
Cryptophyta: Cryptomonas curvata	0.019646	Bacillariophyta-Cyclotella-choctawhatcheeana	0.0221812	Bacillariophyta: Cyclotella	0.029129	Bacillariophyta-Aulacoseira	0.0245749	Cryptophyta: Cryptomonadaceae	0.0356354	Bacillariophyta-Aulacoseiraceae	0.0217674
Bacillariophyta: Aulacoseira granulata	0.0195839	Cyanobacteria-Pseudanabaena-mucicola	0.0212606	Cryptophyta: Cryptomonas	0.0213163	Cryptophyta-Cryptomonas	0.0237618	Cryptophyta: Geminigeraceae	0.034072	Chlorophyta-Chlamydomonadaceae	0.0217252
Cryptophyta: Plagioselmis prolonga	0.0179981	Chlorophyta-Eudorina-elegans	0.0203087	Bacillariophyta: Thalassiosira	0.0210494	Chlorophyta-Chlamydomonas	0.0204127	Bacillariophyta: Thalassiosiraceae	0.0169041	Cyanobacteria-Pseudanabaenaceae	0.01748
Cryptophyta: Guillardia theta	0.0178169	Cryptophyta-Teleaulax-acuta	0.0187522	Chlorophyta: Chlamydomonas	0.0184495	Cyanobacteria-Pseudanabaena	0.019433	Pyrrophyta: Kryptoperidiniaceae	0.0148279	Cryptophyta-Geminigeraceae	0.0165139
Pyrrophyta: Heterocapsa triquetra	0.0144001	Chlorophyta-Phacotus-lenticularis	0.0162226	Cyanobacteria: Dolichospermum	0.0172262	Chlorophyta-Mychonastes	0.0125245	Cyanobacteria: Aphanizomenonaceae	0.0147739	Cyanobacteria-Microcoleaceae	0.0123717
Bacillariophyta: Cyclotella pseudostelligera	0.0134831	Cryptophyta-Plagioselmis-prolonga	0.0114025	Pyrrophyta: Unruhdinium	0.0156373	Cryptophyta-Teleaulax	0.0116293	Chlorophyta: Chlorellaceae	0.013851	Cryptophyta-Pyrenomonadaceae	0.0116803
Chlorophyta: Phacotus lenticularis	0.0124236	Euglenida-Lepocinclis-acus	0.0112838	Cryptophyta: Plagioselmis	0.0138182	Chlorophyta-Eudorina	0.00955167	Chrysophyta: Monodopsidaceae	0.0132922	Chlorophyta-Mychonastaceae	0.0100263
Chrysophyta: Trachydiscus minutus	0.0123801	Bacillariophyta-Cyclotella-meneghiniana	0.0107245	Chrysophyta: Nannochloropsis	0.0132041	Cyanobacteria-Planktothrix	0.00947776	Chlorophyta: Scenedesmaceae	0.0111119	Chlorophyta-Volvocaceae	0.00782751
Euglenida: Trachydiscus minutus	0.0123801	Chrysophyta-Trachydiscus-minutus	0.00766046	Cryptophyta: Guillardia	0.0130684	Bacillariophyta-Stephanodiscus	0.0093532	Chlorophyta: Selenastraceae	0.0109771	Chlorophyta-Scenedesmaceae	0.00729273
Cyanobacteria: Synechocystis limnetica	0.0118547	Euglenida-Trachydiscus-minutus	0.00766046	Bacillariophyta: Aulacoseira	0.0116183	Cryptophyta-Plagioselmis	0.00910345	Bacillariophyta: Aulacoseiraceae	0.0093433	Chrysophyta-Monodopsidaceae	0.00699887
Chlorophyta: Chlamydomonas mexicana	0.0117734	Chlorophyta-Microglena-monadina	0.00737157	Chlorophyta: Mychonastes	0.0101008	Cryptophyta-Guillardia	0.0081967	Chlorophyta: Mychonastaceae	0.00892904	Chlorophyta-Phacotaceae	0.00671588
Pyrrophyta: Unruhdinium penardii	0.0103292	Cryptophyta-Cryptomonas-curvata	0.00704979	Chlorophyta: Chlorella	0.00870297	Chlorophyta-Phacotus	0.00777718	Cryptophyta: Hemiselmidaceae	0.00761976	Cyanobacteria-Aphanizomenonaceae	0.00619278
Chrysophyta: Paraphysomonas uniformis	0.00986292	Cyanobacteria-Planktothrix-agardhii	0.00656762	Cryptophyta: Hemiselmis	0.00867181	Chrysophyta-Nannochloropsis	0.00737402	Cryptophyta: Pyrenomonadaceae	0.00724301	Chlorophyta-Sphaeropleaceae	0.00566803
Bacillariophyta: Aulacoseira subarctica	0.00854067	Pyrrophyta-Heterocapsa-triquetra	0.00644414	Chrysophyta: Paraphysomonas	0.00624111	Cyanobacteria-Dolichospermum	0.00652902	Cryptophyta: Chroomonadaceae	0.00559567	Chlorophyta-Chlorellaceae	0.00552846
Chlorophyta: Microglena monadina	0.00776857	Bacillariophyta-Cyclotella-pseudostelligera	0.00637825	Pyrrophyta: Heterocapsa	0.00600675	Cryptophyta-Hemiselmis	0.0058859	Chrysophyta: Chromulinaceae	0.00538662	Cryptophyta-Hemiselmidaceae	0.0052951
Chlorophyta: Pseudoschroederia antillarum	0.00754905	Cryptophyta-Guillardia-theta	0.00609959	Chrysophyta: Trachydiscus	0.00590737	Euglenida-Lepocinclis	0.00584145	Chrysophyta: Paraphysomonadaceae	0.0051146	Euglenida-Phacaceae	0.00460024
Cyanobacteria: Hydrocoryne spongiosa	0.00729112	Cyanobacteria-Planktothricoides-raciborskii	0.00503835	Euglenida: Trachydiscus	0.00590737	Pyrrophyta-Unruhdinium	0.00526004	Pyrrophyta: Heterocapsaceae	0.00469693	Chrysophyta-Chromulinaceae	0.00453463
Cryptophyta: Plagioselmis nannoplanctica	0.00669273	Cryptophyta-Cryptomonas-borealis	0.00485922	Cryptophyta: Chroomonas	0.00583442	Bacillariophyta-Melosira	0.00508061	Cyanobacteria: Nostocaceae	0.00419744	Bacillariophyta-Melosiraceae	0.00451858
Cryptophyta: Chroomonas mesostigmatica	0.00667178	Heterokontophyta-Mallomonas-tonsurata	0.00456838	Chlorophyta: Desmodesmus	0.00521795	Chrysophyta-Trachydiscus	0.00382297	Chlorophyta: Phacotaceae	0.00373105	Pyrrophyta-Kryptoperidiniaceae	0.00438968
Cyanobacteria: Cyanobium gracile	0.00584793	Cyanobacteria-Planktothrix-spiroides	0.0044509	Chlorophyta: Monoraphidium	0.00505305	Euglenida-Trachydiscus	0.00382297	Chlorophyta: Chlorococcaceae	0.00354586	Pyrrophyta-Suessiaceae	0.00347725
Chrysophyta: Nannochloropsis oceanica	0.00575142	Chlorophyta-Sphaeroplea-annulina	0.00437535	Cyanobacteria: Cyanobium	0.00466831	Chlorophyta-Microglena	0.00343889	Cyanobacteria: Merismopediaceae	0.00298509	Cyanobacteria-Nostocaceae	0.00322519
Bacillariophyta: Stephanodiscus suzukii	0.00487619	Chlorophyta-Chlamydomonas-reinhardtii	0.00409706	Chlorophyta: Phacotus	0.00462534	Cyanobacteria-Planktothricoides	0.00310899	Heterokontophyta: Mallomonadaceae	0.0025799	Chlorophyta-Oocystaceae	0.00264549
Bacillariophyta: Cyclotella meneghiniana	0.00487565	Chlorophyta-Neochlorosarcina-negevensis	0.00390876	Cyanobacteria: Synechocystis	0.00428368	Pyrrophyta-Heterocapsa	0.00291483	Ochrophyta: Mallomonadaceae	0.0025799	Cryptophyta-Chroomonadaceae	0.00248426
Chrysophyta: Vacuoliviride crystalliferum	0.00472825	Chlorophyta-Auxenochlorella-pyrenoidosa	0.00372073	Chlorophyta: Microglena	0.00413581	Cyanobacteria-Anabaena	0.0027643	Pyrrophyta: Dinophysiaceae	0.00245331	Chlorophyta-Selenastraceae	0.00244163
Chlorophyta: Choricystis parasitica	0.00451241	Bacillariophyta-Cyclotella-atomus	0.00339182	Chlorophyta: Spongiococcum	0.00378058	Chlorophyta-Desmodesmus	0.00268683	Chlorophyta: Schroederiaceae	0.00227485	Heterokontophyta-Mallomonadaceae	0.00235143
Heterokontophyta: Chattonella subsalsa	0.00379027	Cyanobacteria-Planktothrix-pseudagardhii	0.00331398	Chlorophyta: Choricystis	0.00357287	Chlorophyta-Dysmorphococcus	0.00250983	Cryptophyta: Goniomonadaceae	0.00196518	Ochrophyta-Mallomonadaceae	0.00235143
Cryptophyta: Cryptomonas ovata	0.00347898	Pyrrophyta-Unruhdinium-penardii	0.00304273	Pyrrophyta: Dinophysis	0.00302729	Heterokontophyta-Mallomonas	0.00247212	Bacillariophyta: Bacillariaceae	0.00177162	Pyrrophyta-Heterocapsaceae	0.00219401
Pyrrophyta: Nusuttodinium aeruginosum	0.00318609	Ochrophyta-Mallomonas-tonsurata	0.00278459	Chlorophyta: Pseudoschroederia	0.00278431	Ochrophyta-Mallomonas	0.00247212	Chrysophyta: Apoikiaceae	0.00131085	Chrysophyta-Dinobryaceae	0.00171941
Pyrrophyta: Unruhdinium niei	0.0030931	Bacillariophyta-Nitzschia-palea	0.00267465	Chrysophyta: Spumella	0.00265109	Chlorophyta-Monoraphidium	0.00227566	Chlorophyta: Oocystaceae	0.00126562	Bacillariophyta-Bacillariaceae	0.00148195
Bacillariophyta: Skeletonema potamos	0.00296594	Chlorophyta-Atractomorpha-echinata	0.00246464	Cyanobacteria: Hydrocoryne	0.0025589	Chlorophyta-Chlorella	0.00216985	Chlorophyta: Koliellaceae	0.00124507	Cyanobacteria-Merismopediaceae	0.00130954
Chrysophyta: Apoikiospumella mondseeiensis	0.00289558	Cyanobacteria-Merismopedia-tenuissima	0.00230216	Cyanobacteria: Anabaena	0.00236542	Chlorophyta-Sphaeroplea	0.00204449	Bacillariophyta: Fragilariaceae	0.00117651	Bacillariophyta-Thalassiosiraceae	0.00129545
Pyrrophyta: Durinskia baltica	0.00284433	Pyrrophyta-Asulcocephalium-miricentonis	0.00223319	Cryptophyta: Goniomonas	0.00231482	Chrysophyta-Poteriospumella	0.00193936	Pyrrophyta: Gymnodiniaceae	0.00108895	Pyrrophyta-Dinophysiaceae	0.00114149
Chlorophyta: Neochlorosarcina negevensis	0.00251599	Chlorophyta-Pseudoschroederia-antillarum	0.00207783	Chrysophyta: Vacuoliviride	0.00214938	Chlorophyta-Neochlorosarcina	0.00189241	Euglenida: Phacaceae	0.000898092	Chlorophyta-Schroederiaceae	0.00102982
Cyanobacteria: Dolichospermum circinale	0.00249701	Heterokontophyta-Heterosigma-akashiwo	0.0020761	Bacillariophyta: Nitzschia	0.00183435	Chlorophyta-Auxenochlorella	0.0016765	Bacillariophyta: Skeletonemataceae	0.00087889	Chrysophyta-Paraphysomonadaceae	0.00101713
Chlorophyta: Kirchneriella aperta	0.00241512	Chlorophyta-Mychonastes-homosphaera	0.00205364	Chlorophyta: Tetradesmus	0.00181613	Cryptophyta-Chroomonas	0.00158359	Cyanobacteria: Pseudanabaenaceae	0.000877065	Heterokontophyta-Chattonellaceae	0.000910375
Bacillariophyta: Cyclotella atomus	0.00240809	Chrysophyta-Vacuoliviride-crystalliferum	0.0020177	Chlorophyta: Ankistrodesmus	0.00156283	Bacillariophyta-Nitzschia	0.0015137	Bacillariophyta: Melosiraceae	0.000870848	Pyrrophyta-Pavlovaceae	0.000838494
Pyrrophyta: Exuviaella pusilla	0.00240261	Cryptophyta-Plagioselmis-nannoplanctica	0.00197415	Heterokontophyta: Synura	0.00145029	Bacillariophyta-Thalassiosira	0.00144965	Chlorophyta: Haematococcaceae	0.000859512	Cryptophyta-Goniomonadaceae	0.00066089
Chlorophyta: Nannochloris bacillaris	0.00236319	Chlorophyta-Chlamydomonas-mexicana	0.00196023	Ochrophyta: Synura	0.00145029	Pyrrophyta-Dinophysis	0.00138337	Chlorophyta: Chlorodendraceae	0.000708529	Chlorophyta-Dunaliellaceae	0.0005843
Chrysophyta: Paraphysomonas butcheri	0.00232334	Cryptophyta-Cryptomonas-pyrenoidifera	0.00189726	Chrysophyta: Apoikiospumella	0.00141677	Chrysophyta-Spumella	0.00128982	Chrysophyta: Dinobryaceae	0.000662095	Heterokontophyta-Synuraceae	0.000485604
Chlorophyta: Spongiococcum tetrasporum	0.00220076	Cryptophyta-Chroomonas-mesostigmatica	0.00180362	Pyrrophyta: Durinskia	0.00137092	Chlorophyta-Tetradesmus	0.00128926	Heterokontophyta: Chattonellaceae	0.000635183	Ochrophyta-Synuraceae	0.000485604
Chlorophyta: Tetradesmus obliquus	0.00219564	Pyrrophyta-Pavlova-pinguis	0.00177666	Heterokontophyta: Mallomonas	0.0013534	Chlorophyta-Atractomorpha	0.00119949	Pyrrophyta: Prorocentraceae	0.000505884	Bacillariophyta-Naviculaceae	0.000484628
Heterokontophyta: Mallomonas tonsurata	0.00206801	Chlorophyta-Chlamydomonas-incerta	0.00162079	Ochrophyta: Mallomonas	0.0013534	Chrysophyta-Paraphysomonas	0.0011345	Chlorophyta: Bathycoccaceae	0.000441249	Chrysophyta-Apoikiaceae	0.000472383
Chlorophyta: Marvania geminata	0.00206398	Chrysophyta-Anthophysa-vegetans	0.00144702	Chlorophyta: Kirchneriella	0.00134662	Cyanobacteria-Merismopedia	0.00112519	Pyrrophyta: Symbiodiniaceae	0.000390842	Chlorophyta-Chlorococcaceae	0.000466354
Chlorophyta: Monoraphidium griffithii	0.00188248	Chlorophyta-Psephonema-aenigmaticum	0.00132337	Chlorophyta: Nannochloris	0.00130178	Heterokontophyta-Heterosigma	0.00111427	Bacillariophyta: Surirellaceae	0.000362419	Cyanobacteria-Chroococcaceae	0.000434707
Chlorophyta: Planctonema lauterbornii	0.00146757	Chlorophyta-Tetradesmus-acuminatus	0.00127005	Chlorophyta: Wislouchiella	0.00127072	Pyrrophyta-Asulcocephalium	0.00108162	Chlorophyta: Pedinomonadaceae	0.000360864	Cyanobacteria-Hyellaceae	0.000417827
Bacillariophyta: Asterionella ralfsii	0.00146559	Heterokontophyta-Synura-uvella	0.00120515	Bacillariophyta: Skeletonema	0.00114637	Chlorophyta-Pseudoschroederia	0.00101338	Euglenida: Euglenaceae	0.00032608	Chlorophyta-Pedinomonadaceae	0.000355276
Heterokontophyta: Synura glabra	0.00143118	Chrysophyta-Apoikiospumella-mondseeiensis	0.00105473	Pyrrophyta: Nusuttodinium	0.00113268	Chrysophyta-Ochromonas	0.000917268	Pyrrophyta: Pfiesteriaceae	0.000293756	Chlorophyta-Bracteamorphaceae	0.000347959
Ochrophyta: Mallomonas glabra	0.00143118	Cyanobacteria-Limnococcus-limneticus	0.00104831	Chlorophyta: Scenedesmus	0.00112596	Chrysophyta-Vacuoliviride	0.000885171	Bacillariophyta: Eunotiaceae	0.000288086	Chlorophyta-Haematococcaceae	0.0003004
Cryptophyta: Cryptomonas pyrenoidifera	0.00141121	Chrysophyta-Pseudellipsoidion-edaphicum	0.00104105	Chrysophyta: Ochromonas	0.00108082	Pyrrophyta-Pavlova	0.000878175	Chlorophyta: Neochloridaceae	0.000278754	Chlorophyta-Treubariaceae	0.000200894
Chlorophyta: Chlamydomonas noctigama	0.00140073	Chlorophyta-Tetradesmus-obliquus	0.00100805	Cyanobacteria: Pseudanabaena	0.00107635	Chlorophyta-Planctonema	0.000749417	Euglenida: Euglyphidae	0.00027047	Bacillariophyta-Acanthocerataceae	0.000197834
Chlorophyta: Chlamydomonas fasciata	0.00125394	Bacillariophyta-Aulacoseira-subarctica	0.000996131	Chlorophyta: Chlorogonium	0.00106669	Chlorophyta-Micractinium	0.000739679	Chlorophyta: Asteromonadaceae	0.000257101	Pyrrophyta-Prorocentraceae	0.000170332
Chlorophyta: Chlamydomonas parkeae	0.00124924	Chlorophyta-Micractinium-pusillum	0.000992019	Chlorophyta: Micractinium	0.00102939	Chrysophyta-Anthophysa	0.000713556	Chlorophyta: Mamiellaceae	0.000244438	Bacillariophyta-Rhizosoleniaceae	0.000169871
Cryptophyta: Cryptomonas obovoidea	0.00124496	Cryptophyta-Cryptomonas-ovata	0.000943625	Chlorophyta: Dictyosphaerium	0.00101407	Cryptophyta-Rhodomonas	0.000697621	Heterokontophyta: Synuraceae	0.000240188	Chrysophyta-Neomonodaceae	0.000158665
Cryptophyta: Hemiselmis cryptochromatica	0.00118016	Cyanobacteria-Hyella-patelloides	0.000937379	Bacillariophyta: Cyclostephanos	0.000945824	Chlorophyta-Wislouchiella	0.00066863	Ochrophyta: Synuraceae	0.000240188	Chlorophyta-Crustomastigaceae	0.00015771
Chlorophyta: Heterotetracystis akinetos	0.00117422	Cyanobacteria-Annamia-toxica	0.000819118	Chlorophyta: Tetraselmis	0.000942213	Chlorophyta-Psephonema	0.000656842	Bacillariophyta: Rhizosoleniaceae	0.000221702	Chlorophyta-Schizochlamydaceae	0.0001551
Bacillariophyta: Melosira tropica	0.00117406	Cryptophyta-Rhodomonas-minuta	0.000801567	Bacillariophyta: Melosira	0.000941764	Heterokontophyta-Chrysosphaerella	0.000644271	Bacillariophyta: Ulnariaceae	0.000194759	Ochrophyta-Ochromonadaceae	0.00015006
Chlorophyta: Monoraphidium dybowskii	0.00108546	Chlorophyta-Dangeardinia-pseudopertusa	0.000786573	Cryptophyta: Rhodomonas	0.000912245	Ochrophyta-Chrysosphaerella	0.000644271	Bacillariophyta: Naviculaceae	0.000193457	Pyrrophyta-Symbiodiniaceae	0.000147496
Bacillariophyta: Thalassiosira pseudonana	0.00108425	Cryptophyta-Hemiselmis-rufescens	0.000778988	Chlorophyta: Neochlorosarcina	0.000856537	Cryptophyta-Goniomonas	0.000634422	Chlorophyta: Sphaeropleaceae	0.000186418	Chlorophyta-Rotundellaceae	0.000144239
Heterokontophyta: Heterosigma akashiwo	0.00103871	Chlorophyta-Planctonema-lauterbornii	0.000778532	Bacillariophyta: Asterionella	0.000848994	Chrysophyta-Apoikiospumella	0.000521893	Chlorophyta: Rotundellaceae	0.000181132	Pyrrophyta-Pfiesteriaceae	0.000141323
Chlorophyta: Scenedesmus quadricauda	0.000991977	Chlorophyta-Bracteamorpha-trainorii	0.000748361	Chlorophyta: Marvania	0.000825624	Cyanobacteria-Limnococcus	0.000510256	Chrysophyta: Eustigmataceae	0.000167771	Chlorophyta-Neochloridaceae	0.000138217
Heterokontophyta: Mallomonas annulata	0.000952127	Chlorophyta-Chlamydomonas-frankii	0.000734744	Chrysophyta: Uroglena	0.000784893	Chlorophyta-Oocystis	0.000494975	Chlorophyta: Radiococcaceae	0.000158196	Chrysophyta-Ceratiaceae	0.000123982
Chlorophyta: Micractinium reisseri	0.000950104	Chlorophyta-Planctonema-gelatinosa	0.000709162	Pyrrophyta: Exuviaella	0.000678223	Chrysophyta-Pseudellipsoidion	0.000492297	Pyrrophyta: Suessiaceae	0.00013881	Pyrrophyta-Ceratiaceae	0.000123982
Chlorophyta: Nephrochlamys subsolitaria	0.000881281	Chrysophyta-Goniochloris-sculpta	0.000683397	Chlorophyta: Heterotetracystis	0.000621558	Cyanobacteria-Annamia	0.000492219	Ochrophyta: Ochromonadaceae	0.000129108	Bacillariophyta-Hemidiscaceae	0.000123864
Chlorophyta: Koliella spiculiformis	0.000870405	Euglenida-Goniochloris-sculpta	0.000683397	Chlorophyta: Planctonema	0.000613488	Chlorophyta-Dunaliella	0.000473337	Chlorophyta: Crustomastigaceae	0.000101331	Chlorophyta-Asteromonadaceae	0.000122364
Pyrrophyta: Levanderina fissa	0.000863982	Pyrrophyta-Unruhdinium-niei	0.000644845	Chlorophyta: Koliella	0.000574061	Cyanobacteria-Hyella	0.000471217	Chrysophyta: Chrysosphaeraceae	9.96826e-05	Pyrrophyta-Gymnodiniaceae	0.00010099
Bacillariophyta: Stephanodiscus hantzschii	0.000853556	Chrysophyta-Poteriospumella-lacustris	0.000636967	Chlorophyta: Ostreococcus	0.000541618	Cyanobacteria-Gloeocapsa	0.000470954	Chlorophyta: Bracteamorphaceae	7.39558e-05	Chlorophyta-Koliellaceae	6.88211e-05
Chlorophyta: Auxenochlorella pyrenoidosa	0.000845581	Chlorophyta-Pedinomonas-minor	0.000636566	Heterokontophyta: Chattonella	0.000541328	Chlorophyta-Pedinomonas	0.000448274	Chlorophyta: Dunaliellaceae	7.35248e-05	Chlorophyta-Monomastigaceae	6.74708e-05
Ochrophyta: Mallomonas tonsurata	0.000810466	Cyanobacteria-Dolichospermum-circinale	0.000621678	Chrysophyta: Poteriospumella	0.000507249	Chlorophyta-Dangeardinia	0.000440217	Chlorophyta: Hydrodictyaceae	6.18668e-05	Cyanobacteria-Coelosphaeriaceae	6.29279e-05
Chrysophyta: Goniochloris sculpta	0.00077898	Bacillariophyta-Thalassiosira-oceanica	0.000613064	Chlorophyta: Dangeardinia	0.00050055	Chlorophyta-Scenedesmus	0.00042224	Heterokontophyta: Chrysochromulinaceae	5.97317e-05	Bacillariophyta-Surirellaceae	6.12847e-05
Euglenida: Goniochloris sculpta	0.00077898	Chlorophyta-Chlamydomonas-raudensis	0.000605742	Pyrrophyta: Symbiodinium	0.000487454	Bacillariophyta-Mayamaea	0.000419557	Chlorophyta: Pseudomuriellaceae	5.00116e-05	Chlorophyta-Radiococcaceae	5.17447e-05
Chlorophyta: Pedinomonas tuberculata	0.000775088	Chlorophyta-Oocystis-lacustris	0.000598831	Euglenida: Lepocinclis	0.000463214	Heterokontophyta-Rhizochromulina	0.000398517	Bacillariophyta: Cymatosiraceae	4.68725e-05	Euglenida-Euglyphidae	5.02693e-05
Chlorophyta: Oogamochlamys gigantea	0.000750716	Chlorophyta-Kirchneriella-aperta	0.000598385	Chlorophyta: Pedinomonas	0.000439496	Chlorophyta-Bracteamorpha	0.000381901	Chlorophyta: Volvocaceae	4.64562e-05	Chlorophyta-Hydrodictyaceae	4.48556e-05
Chlorophyta: Mychonastes homosphaera	0.000728678	Bacillariophyta-Mayamaea-permitis	0.000595706	Chlorophyta: Oogamochlamys	0.000429605	Chlorophyta-Asterococcus	0.000368892	Chrysophyta: Chrysosaccaceae	4.45808e-05	Chlorophyta-Pseudomuriellaceae	4.40414e-05
Chlorophyta: Dangeardinia pseudopertusa	0.000706261	Chlorophyta-Chlorosarcina-brevispinosa	0.000590473	Chlorophyta: Picochlorum	0.00042181	Chlorophyta-Chlorosarcina	0.000335873	Euglenida: Sphenomonadidae	3.82017e-05	Pyrrophyta-Thoracosphaeraceae	4.00906e-05
Ochrophyta: Chrysosphaerella tonsurata	0.00070176	Chlorophyta-Chloromonas-oogama	0.000588076	Chlorophyta: Tetrastrum	0.000385966	Chlorophyta-Spongiococcum	0.000316042	Pyrrophyta: Pavlovaceae	2.71692e-05	Euglenida-Sphenomonadidae	3.79711e-05
Pyrrophyta: Gymnodinium eucyaneum	0.000701051	Chlorophyta-Nautococcus-solutus	0.000564777	Chlorophyta: Auxenochlorella	0.000370679	Cyanobacteria-Hydrocoryne	0.00031456	Cyanobacteria: Microcoleaceae	2.70071e-05	Chlorophyta-Characiosiphonaceae	3.36274e-05
Cryptophyta: Hemiselmis rufescens	0.000691768	Cyanobacteria-Hydrocoryne-spongiosa	0.000548394	Chlorophyta: Nephrochlamys	0.000347636	Chlorophyta-Chloromonas	0.00031105	Chrysophyta: Loboceae	2.52466e-05	Chrysophyta-Lophodiniaceae	2.89622e-05
Chlorophyta: Tetrastrum staurogeniiforme	0.000687543	Cryptophyta-Chroomonas-caudata	0.00053451	Chrysophyta: Goniochloris	0.000339629	Chlorophyta-Kirchneriella	0.000300167	Chrysophyta: Ceratiaceae	2.38008e-05	Pyrrophyta-Lophodiniaceae	2.89622e-05
Chlorophyta: Ankistrodesmus stipitatus	0.000673995	Ochrophyta-Cornospumella-uvella	0.000509929	Euglenida: Goniochloris	0.000339629	Chrysophyta-Goniochloris	0.000286375	Pyrrophyta: Ceratiaceae	2.38008e-05	Chlorophyta-Bracteacoccaceae	2.6034e-05
Bacillariophyta: Nitzschia palea	0.000667383	Chrysophyta-Spumella-like-flagellate	0.000507216	Bacillariophyta: Eunotia	0.000331681	Euglenida-Goniochloris	0.000286375	Chlorophyta: Treubariaceae	2.27185e-05	Heterokontophyta-Pavlovaceae	2.4091e-05
Chlorophyta: Trochiscia hystrix	0.000663645	Bacillariophyta-Urosolenia-eriensis	0.000488326	Bacillariophyta: Surirella	0.000328321	Chlorophyta-Choricystis	0.00028579	Chrysophyta: Pseudocharaciopsidaceae	2.21256e-05	Heterokontophyta-Vacuolariaceae	2.23987e-05
Bacillariophyta: Urosolenia eriensis	0.000655148	Chrysophyta-Ochromonas-tuberculata	0.000482917	Pyrrophyta: Gymnodinium	0.000323035	Heterokontophyta-Synura	0.000274387	Bacillariophyta: Acanthocerataceae	1.90163e-05	Chlorophyta-Bathycoccaceae	1.72355e-05
Chlorophyta: Tetradesmus dimorphus	0.00061185	Ochrophyta-Synura-tonsurata	0.000476626	Euglenida: Euglypha	0.000322574	Ochrophyta-Synura	0.000274387	Pyrrophyta: Thoracosphaeraceae	1.55431e-05	Bacillariophyta-Eunotiaceae	1.63176e-05
Chlorophyta: Chlorotetraedron incus	0.000607354	Chlorophyta-Choricystis-parasitica	0.000471593	Heterokontophyta: Heterosigma	0.00031755	Cyanobacteria-Sphaerospermopsis	0.000265007	Chlorophyta: Monomastigaceae	1.52105e-05	Heterokontophyta-Chrysochromulinaceae	1.59897e-05
Chlorophyta: Ankistrodesmus falcatus	0.000491917	Ochrophyta-Acrispumella-tonsurata	0.000470905	Heterokontophyta: Chrysosphaerella	0.000315132	Chlorophyta-Nautococcus	0.000249099	Chrysophyta: Hydruraceae	1.48489e-05	Euglenida-Euglenaceae	1.51453e-05
Cryptophyta: Goniomonas truncata	0.000482511	Chlorophyta-Mychonastes-jurisii	0.000461344	Ochrophyta: Chrysosphaerella	0.000315132	Chlorophyta-Chlorogonium	0.000246574	Chlorophyta: Golenkiniaceae	1.38201e-05	Bacillariophyta-Skeletonemataceae	1.47337e-05
Chlorophyta: Halochlorella rubescens	0.000474579	Chlorophyta-Monoraphidium-griffithii	0.000428517	Chlorophyta: Pteromonas	0.000306524	Chlorophyta-Picochlorum	0.000237178	Chlorophyta: Coccomyxaceae	1.34087e-05	Chrysophyta-Pseudocharaciopsidaceae	1.45804e-05
Chlorophyta: Raphidonema nivale	0.000473902	Chlorophyta-Micractinium-reisseri	0.000411998	Pyrrophyta: Levanderina	0.00029317	Bacillariophyta-Acanthoceras	0.000217745	Chrysophyta: Hibberdiaceae	1.24978e-05	Pyrrophyta-Tovelliaceae	1.44933e-05
Chlorophyta: Tetradesmus acuminatus	0.000453	Ochrophyta-Chrysosphaerella-tonsurata	0.000391966	Euglenida: Euglena	0.00028967	Bacillariophyta-Urosolenia	0.000216788	Cyanobacteria: Hyellaceae	1.13391e-05	Chrysophyta-Eustigmataceae	1.37576e-05
Chlorophyta: Chlorella vulgaris	0.000450538	Pyrrophyta-Exuviaella-pusilla	0.000371864	Chlorophyta: Chlorotetraedron	0.00028768	Chlorophyta-Treubaria	0.000216234	Chlorophyta: Schizochlamydaceae	1.05754e-05	Chlorophyta-Chlorocystidaceae	1.22284e-05
Bacillariophyta: Ulnaria ulna	0.000447672	Chlorophyta-Heterotetracystis-akinetos	0.000370599	Heterokontophyta: Rhizochromulina	0.000285752	Pyrrophyta-Exuviaella	0.000193427	Pyrrophyta: Kareniaceae	1.05371e-05	Chlorophyta-Nephroselmidaceae	1.19803e-05
Chlorophyta: Gloeotila contorta	0.000437597	Chrysophyta-Nannochloropsis-oceanica	0.00036108	Bacillariophyta: Urosolenia	0.000276665	Chrysophyta-Uroglena	0.000192818	Bacillariophyta: Chaetocerotaceae	1.02147e-05	Cyanobacteria-Cyanobacteriaceae	1.18589e-05
Chlorophyta: Schroederia setigera	0.000428148	Chlorophyta-Treubaria-setigera	0.000360534	Chlorophyta: Halochlorella	0.000274768	Pyrrophyta-Symbiodinium	0.00018319	Cyanobacteria: Coelosphaeriaceae	9.55886e-06	Euglenida-Paulinellidae	1.18167e-05
Chlorophyta: Mychonastes jurisii	0.000424288	Chrysophyta-Paraphysomonas-butcheri	0.000351207	Chlorophyta: Chloromonas	0.000271674	Chlorophyta-Heterotetracystis	0.000175741	Bacillariophyta: Leptocylindraceae	9.08472e-06	Chlorophyta-Botryococcaceae	1.05018e-05
Bacillariophyta: Surirella brebissonii	0.00041569	Chlorophyta-Actinastrum-hantzschii	0.000347104	Bacillariophyta: Synedra	0.000271056	Chlorophyta-Actinastrum	0.000174914	Cyanobacteria: Prochloraceae	8.98962e-06	Cyanobacteria-Leptolyngbyaceae	9.96937e-06
Chrysophyta: Epipyxis aureus	0.000387017	Chlorophyta-Parachlorella-kessleri	0.000346883	Chlorophyta: Micromonas	0.000260585	Chlorophyta-Parachlorella	0.0001742	Cyanobacteria: Chroococcaceae	8.95568e-06	Cyanobacteria-Chroococcidiopsidaceae	8.69721e-06
Ochrophyta: Cornospumella tonsurata	0.000386611	Chrysophyta-Ochromonas-distigma	0.000321484	Chlorophyta: Gloeotila	0.000245315	Chlorophyta-Hafniomonas	0.000168444	Chrysophyta: Gonyaulacaceae	4.68318e-06	Pyrrophyta-Kareniaceae	8.22177e-06
Chrysophyta: Ochromonas tuberculata	0.000383589	Chlorophyta-Ankyra-judayi	0.00031614	Chlorophyta: Trochiscia	0.000234462	Chlorophyta-Crustomastix	0.000168123	Pyrrophyta: Gonyaulacaceae	4.68318e-06	Bacillariophyta-Fragilariaceae	6.65852e-06
Chlorophyta: Micractinium pusillum	0.000381832	Chlorophyta-Schroederia-setigera	0.00030982	Chlorophyta: Schroederia	0.000227783	Ochrophyta-Cornospumella	0.000164691	Chlorophyta: Botryococcaceae	4.25128e-06	Chlorophyta-Spondylomoraceae	6.29175e-06
Heterokontophyta: Synura petersenii	0.000371231	Bacillariophyta-Acanthoceras-zachariasii	0.000309239	Bacillariophyta: Ulnaria	0.000204826	Chlorophyta-Rotundella	0.000159213	Chlorophyta: Spondylomoraceae	3.41166e-06	Chlorophyta-Ulvaceae	6.17679e-06
Chrysophyta: Characiopsis saccata	0.000371207	Bacillariophyta-Thalassiosira-gessneri	0.000308452	Chlorophyta: Raphidonema	0.000196947	Chlorophyta-Schroederia	0.000156517	Euglenida: Cyphoderiidae	3.31218e-06	Chlorophyta-Chlorodendraceae	5.55897e-06
Chlorophyta: Rotundella rotunda	0.000359134	Chlorophyta-Chlorella-vulgaris	0.00029965	Chlorophyta: Rotundella	0.00019664	Chrysophyta-Chromulinospumella	0.000154795	Chlorophyta: Scotinosphaeraceae	3.30017e-06	Chlorophyta-Trebouxiaceae	5.3805e-06
Chlorophyta: Sphaeroplea annulina	0.000352287	Chrysophyta-Chromulinospumella-sphaerica	0.000297479	Euglenida: Discoplastis	0.000180725	Chlorophyta-Ankyra	0.000149863	Chlorophyta: Nephroselmidaceae	3.18903e-06	Bacillariophyta-Ulnariaceae	4.94992e-06
Cryptophyta: Hemiselmis tepida	0.000334946	Chlorophyta-Chlamydomonas-globosa	0.000293646	Chlorophyta: Chlorosarcinopsis	0.000168885	Cryptophyta-Komma	0.000137117	Bacillariophyta: Stauroneidaceae	1.13445e-06	Cyanobacteria-Prochloraceae	4.5708e-06
Cryptophyta: Rhodomonas minuta	0.000332591	Chlorophyta-Rotundella-rotunda	0.000291944	Chrysophyta: Characiopsis	0.000165848	Chlorophyta-Halochlorella	0.000131403	Chlorophyta: Ulvaceae	1.01544e-06	Chlorophyta-Golenkiniaceae	4.17212e-06
Bacillariophyta: Asterionella formosa	0.000325952	Chlorophyta-Chlorogonium-elongatum	0.000291856	Chlorophyta: Carteria	0.00016574	Chrysophyta-Ceratium	0.000130749	Cyanobacteria: Oscillatoriaceae	1.00058e-06	Chrysophyta-Gonyaulacaceae	7.69397e-07
Euglenida: Lepocinclis tripteris	0.000323732	Chlorophyta-Chlamydomonas-leiostraca	0.00028179	Chlorophyta: Radiococcus	0.000162721	Pyrrophyta-Ceratium	0.000130749	Bacillariophyta: Catenulaceae	9.01899e-07	Pyrrophyta-Gonyaulacaceae	7.69397e-07
Chrysophyta: Paraphysomonas segmenta	0.000318486	Cryptophyta-Komma-caudata	0.000278711	Bacillariophyta: Discostella	0.00015008	Bacillariophyta-Actinocyclus	0.000130077			Chlorophyta-Prasiolaceae	6.1145e-07
Chlorophyta: Chlorosarcinopsis arenicola	0.000310486	Chlorophyta-Halochlorella-rubescens	0.000262587	Bacillariophyta: Fragilaria	0.000149132	Chlorophyta-Hariotina	0.000125272			Cyanobacteria-Chamaesiphonaceae	3.8626e-07
Euglenida: Euglena viridis	0.000276442	Ochrophyta-Cornospumella-tonsurata	0.000255723	Chrysophyta: Epipyxis	0.000136223	Chlorophyta-Nephroselmis	0.0001225			Chlorophyta-Mamiellaceae	3.03817e-07
Pyrrophyta: Dinophysis acuminata	0.000274819	Chlorophyta-Chlamydomonas-bacca	0.000254531	Euglenida: Phacus	0.000127115	Cyanobacteria-Cuspidothrix	0.000112898			Cyanobacteria-Rivulariaceae	2.98473e-07
Bacillariophyta: Discostella nipponica	0.000269293	Chlorophyta-Hariotina-reticulata	0.000254248	Chlorophyta: Crustomastix	0.000125176	Chlorophyta-Pandorina	0.000111093
Chlorophyta: Desmodesmus opoliensis	0.000252558	Chlorophyta-Nephroselmis-olivacea	0.000243078	Ochrophyta: Cornospumella	0.00011654	Chlorophyta-Lagerheimia	0.000103345
Bacillariophyta: Thalassiosira gessneri	0.000248284	Chlorophyta-Monoraphidium-dybowskii	0.000235002	Chlorophyta: Spermatozopsis	0.000111472	Pyrrophyta-Durinskia	9.6746e-05
Heterokontophyta: Synura uvella	0.000245895	Chrysophyta-Ceratium-hirundinella	0.000234608	Chlorophyta: Sphaeroplea	0.000105128	Cyanobacteria-Limnothrix	9.09248e-05
Cryptophyta: Cryptomonas marssonii	0.000232824	Pyrrophyta-Ceratium-hirundinella	0.000234608	Chlorophyta: Dysmorphococcus	0.000103421	Chlorophyta-Trochiscia	8.81393e-05
Chlorophyta: Koliella longiseta	0.000230176	Chlorophyta-Pandorina-morum	0.000224942	Chrysophyta: Chrysosphaera	0.000102031	Chlorophyta-Schizochlamys	8.66709e-05
Bacillariophyta: Thalassiosira oceanica	0.000224847	Chlorophyta-Desmodesmus-cuneatus	0.000223473	Chlorophyta: Chlorosarcina	9.89238e-05	Chlorophyta-Planktosphaeria	8.53649e-05
Chlorophyta: Spermatozopsis similis	0.000210421	Cyanobacteria-Cuspidothrix-issatschenkoi	0.000219344	Chlorophyta: Psephonema	9.57852e-05	Chlorophyta-Ankistrodesmus	8.31418e-05
Pyrrophyta: Asulcocephalium miricentonis	0.00020998	Chlorophyta-Scenedesmus-quadricauda	0.000211884	Pyrrophyta: Asulcocephalium	8.96977e-05	Ochrophyta-Acrispumella	8.2142e-05
Chlorophyta: Dangeardinia metastigma	0.000208679	Cyanobacteria-Snowella-litoralis	0.000209252	Chlorophyta: Bracteamorpha	8.07341e-05	Cyanobacteria-Snowella	8.20233e-05
Chlorophyta: Chlamydomonas raudensis	0.000194637	Pyrrophyta-Durinskia-baltica	0.000205802	Chlorophyta: Dunaliella	7.84967e-05	Pyrrophyta-Nusuttodinium	8.02961e-05
Cyanobacteria: Pseudanabaena galeata	0.000193761	Chlorophyta-Pedinomonas-tuberculata	0.000203495	Chrysophyta: Dinobryon	7.80225e-05	Chlorophyta-Gungnir	7.90246e-05
Chlorophyta: Chlorosarcina brevispinosa	0.000193488	Ochrophyta-Poterioochromonas-tonsurata	0.000188575	Cyanobacteria: Merismopedia	7.79546e-05	Chlorophyta-Chlorococcum	7.52496e-05
Chlorophyta: Psephonema aenigmaticum	0.000191714	Bacillariophyta-Melosira-tropica	0.000187583	Pyrrophyta: Tyrannodinium	7.74101e-05	Pyrrophyta-Piscinoodinium	7.18297e-05
Chlorophyta: Pedinomonas minor	0.00019125	Chlorophyta-Schizochlamys-gelatinosa	0.000177924	Bacillariophyta: Conticribra	7.53929e-05	Chlorophyta-Monomastix	6.91456e-05
Chrysophyta: Paraphysomonas imperforata	0.000182594	Chrysophyta-Spumella-sociabilis	0.000177734	Chrysophyta: Anthophysa	7.47082e-05	Chlorophyta-Oocystidium	6.87162e-05
Euglenida: Discoplastis spathirhyncha	0.000178269	Chlorophyta-Gungnir-neglectum	0.000174567	Bacillariophyta: Cylindrotheca	6.76393e-05	Chrysophyta-Pedospumella	6.73435e-05
Cyanobacteria: Merismopedia tenuissima	0.000153659	Chlorophyta-Trochiscia-hystrix	0.000170463	Chrysophyta: Chromulinospumella	6.75604e-05	Bacillariophyta-Surirella	6.62624e-05
Chrysophyta: Spumella rivalis	0.000152864	Cyanobacteria-Coelosphaeriaceae-cyanobacterium	0.000169557	Bacillariophyta: Mayamaea	6.67659e-05	Euglenida-Euglypha	6.10761e-05
Bacillariophyta: Conticribra weissflogiopsis	0.000150855	Chlorophyta-Monoraphidium-contortum	0.000168685	Heterokontophyta: Chrysochromulina	6.37166e-05	Chlorophyta-Neochloris	6.10442e-05
Chrysophyta: Anthophysa vegetans	0.000149941	Cryptophyta-Cryptomonas-obovoidea	0.000164129	Bacillariophyta: Hantzschia	6.32512e-05	Pyrrophyta-Rebecca	5.73943e-05
Chlorophyta: Chloromonas reticulata	0.000145466	Ochrophyta-Mallomonas-msimbaziensis	0.00016329	Chlorophyta: Tetraedron	6.20789e-05	Chlorophyta-Pseudomuriella	4.94684e-05
Cryptophyta: Chroomonas coerulea	0.000144807	Bacillariophyta-Mayamaea-terrestris	0.000159171	Chlorophyta: Pseudomuriella	5.36018e-05	Chlorophyta-Hormotila	4.93508e-05
Chlorophyta: Bracteamorpha trainorii	0.000139967	Chrysophyta-Paraphysomonas-imperforata	0.000158191	Chlorophyta: Hegewaldia	5.26602e-05	Bacillariophyta-Discostella	4.91411e-05
Chrysophyta: Dinobryon divergens	0.000137939	Chlorophyta-Desmodesmus-opoliensis	0.00015414	Chlorophyta: Chloroidium	5.12388e-05	Pyrrophyta-Scrippsiella	4.54179e-05
Chrysophyta: Chromulinospumella sphaerica	0.000134435	Chlorophyta-Chlorogonium-euchlorum	0.000150503	Bacillariophyta: Cymatopleura	5.11623e-05	Chlorophyta-Granulocystis	4.30788e-05
Chlorophyta: Chlamydomonas moewusii	0.000133505	Chlorophyta-Monomastix-minuta	0.000141339	Euglenida: Petalomonas	5.05585e-05	Chlorophyta-Tetraedron	3.99037e-05
Pyrrophyta: Tyrannodinium berolinense	0.000127886	Cyanobacteria-Oscillatoriales-cyanobacterium	0.000140452	Chrysophyta: Chrysosaccus	4.81555e-05	Euglenida-Petalomonas	3.90033e-05
Chlorophyta: Chlorogonium euchlorum	0.000126918	Chlorophyta-Oocystidium-ovale	0.000139609	Chlorophyta: Chlorococcum	4.72572e-05
Chlorophyta: Tetrastrum heteracanthum	0.000126859	Pyrrophyta-Nusuttodinium-aeruginosum	0.000133852
Bacillariophyta: Hantzschia amphioxys	0.000119968	Chlorophyta-Chlamydomonas-subcaudata	0.000123861
Chlorophyta: Planctonema gelatinosa	0.000115069	Chlorophyta-Neochloris-aquatica	0.000122675
Ochrophyta: Acrispumella tonsurata	0.000114628	Pyrrophyta-Unruhdinium-minimum	0.000120296
Euglenida: Petalomonas sphagnophila	0.000113803	Chlorophyta-Dangeardinia-metastigma	0.000120221
Bacillariophyta: Mayamaea permitis	0.000108039	Pyrrophyta-Rebecca-salina	0.000116371
Chlorophyta: Chloroidium saccharophilum	0.00010689	Ochrophyta-Synura-fuschlensis	0.000113909
Chlorophyta: Monoraphidium circinale	0.00010074	Cyanobacteria-Limnothrix-planktonica	0.000110051
Chlorophyta: Desmodesmus cuneatus	0.000100552	Ochrophyta-Cornospumella-fuschlensis	0.000108111
Euglenida: Lepocinclis acus	9.89678e-05	Chrysophyta-Spumella-lacusvadosi	0.000107861
Cyanobacteria: Oscillatoriales cyanobacterium	9.2727e-05	Chlorophyta-Planktosphaeria-gelatinosa	0.00010667
Bacillariophyta: Cylindrotheca closterium	9.06327e-05	Bacillariophyta-Discostella-nipponica	0.000105923
Bacillariophyta: Melosira varians	8.81261e-05	Cryptophyta-Cryptomonas-rostratiformis	0.000103848
Chlorophyta: Phacotus sphaericus	8.80977e-05	Pyrrophyta-Dinophysis-acuminata	9.98671e-05
Euglenida: Discoplastis adunca	8.44686e-05	Cyanobacteria-Dolichospermum-affine	9.5067e-05
Chlorophyta: Chlorococcum echinozygotum	8.26708e-05	Ochrophyta-Poterioochromonas-uvella	9.26435e-05
Bacillariophyta: Nitzschia capitellata	8.19199e-05	Chlorophyta-Hormotila-blennista	9.24038e-05
Cryptophyta: Komma caudata	7.91871e-05	Chlorophyta-Chlamydomonas-pulsatilla	9.12706e-05
Chlorophyta: Chlamydomonas bacca	7.50256e-05	Chrysophyta-Paraphysomonas-segmenta	8.99335e-05
Chlorophyta: Eudorina elegans	7.38985e-05	Chlorophyta-Granulocystis-verrucosa	8.66397e-05
Chlorophyta: Lagerheimia genevensis	7.37609e-05	Ochrophyta-Mallomonas-fuschlensis	8.64829e-05
Chlorophyta: Tetraedron caudatum	7.20858e-05	Chrysophyta-Woloszynskia-leopoliensis	8.2105e-05
Bacillariophyta: Cymatopleura solea	7.00114e-05	Pyrrophyta-Woloszynskia-leopoliensis	8.2105e-05
Chlorophyta: Gungnir kasakii	6.81321e-05	Chlorophyta-Desmodesmus-perforatus	8.01978e-05
Cryptophyta: Cryptomonas rostratiformis	6.73639e-05	Chrysophyta-Paraphysomonas-uniformis	7.60037e-05
Euglenida: Euglena stellata	6.59155e-05	Chlorophyta-Pectinodesmus-pectinatus	7.54805e-05
Chlorophyta: Chlamydomonas rapa	6.24974e-05	Chlorophyta-Lobocharacium-coloradoense	7.48337e-05
Cyanobacteria: Limnococcus limneticus	6.22735e-05	Cyanobacteria-Synechococcus-lividus	7.39839e-05
Chlorophyta: Chlamydomonas frankii	6.22331e-05	Chlorophyta-Monoraphidium-convolutum	7.30909e-05
Cryptophyta: Cryptomonas tetrapyrenoidosa	6.09233e-05	Chlorophyta-Ankistrodesmus-stipitatus	7.24667e-05
Bacillariophyta: Aulacoseira ambigua	5.84149e-05	Chlorophyta-Botryosphaerella-sudetica	7.10101e-05
Chlorophyta: Monoraphidium komarkovae	5.67307e-05	Chlorophyta-Chlamydomonas-pumilio	6.84592e-05
Bacillariophyta: Acanthoceras zachariasii	5.58863e-05	Chlorophyta-Chlamydomonas-noctigama	6.81462e-05
Ochrophyta: Synura tonsurata	5.45408e-05	Cryptophyta-Cryptomonas-marssonii	6.67939e-05
Chrysophyta: Pseudotetraedriella kamillae	5.18448e-05	Chlorophyta-Tetranephris-brasiliensis	6.61212e-05
Bacillariophyta: Bacillaria paxillifer	4.77144e-05	Chlorophyta-Desmodesmus-baconii	6.17163e-05
Chlorophyta: Chloromonas serbinowi	4.61881e-05	Pyrrophyta-Gymnodinium-eucyaneum	5.93262e-05
Chrysophyta: Pseudocharaciopsis ovalis	4.30394e-05	Chlorophyta-Oogamochlamys-zimbabwiensis	5.87756e-05
Bacillariophyta: Nitzschia acicularis	4.28278e-05	Chlorophyta-Chlorotetraedron-incus	5.67516e-05
Chlorophyta: Carteria radiosa	4.2737e-05	Heterokontophyta-Synura-curtispina	5.49924e-05
Chlorophyta: Pectinodesmus pectinatus	4.24754e-05	Chlorophyta-Spongiococcum-tetrasporum	5.09603e-05
		Chlorophyta-Colemanosphaera-charkowiensis	5.09516e-05
		Chlorophyta-Lagerheimia-genevensis	5.08638e-05
		Chlorophyta-Follicularia-paradoxalis	4.81607e-05
		Chlorophyta-Chlamydomonas-gloeophila	4.6584e-05
		Chlorophyta-Ettlia-carotinosa	4.58228e-05
		Chrysophyta-Pseudocharaciopsis-ovalis	4.45384e-05
		Chlorophyta-Chlamydomonas-rapa	4.26823e-05
		Chlorophyta-Chlorella-variabilis	4.20905e-05
		Chlorophyta-Polyedriopsis-spinulosa	4.16962e-05
		Chlorophyta-Oocystis-parva	4.06551e-05
		Chlorophyta-Tetrachlorella-alternans	3.88102e-05
